# Supplementary material for: Boosting the photoelectrochemical activities of all-inorganic perovskite SrTiO3 nanofibers by engineering homo/hetero junctions
Source: Royal Society of Chemistry journal article supplement (doi:10.1039/c8ta05852k), 2018-01-01
Supplement: c8ta05852k1.pdf [file c8ta05852k1.pdf]

## **Supporting Information**

### **Boosting the Photoelectrochemical Activities of All-inorganic Perovskite SrTiO<sub>3</sub> Nanofibers by Engineering Homo/hetero Junctions**

Zhao Liang<sup>1,2,ζ</sup>, Huilin Hou<sup>2,ζ</sup>, Kai Song<sup>2</sup>, Kan Zhang<sup>3</sup>, Zhi Fang<sup>2</sup>, Fengmei Gao<sup>2</sup>, Lin Wang<sup>2</sup>, Ding  
Chen<sup>1,4,\*</sup> and Weiyu Yang<sup>2,\*</sup> and Haibo Zeng<sup>3,\*</sup>

<sup>1</sup>School of Materials Science and Engineering, Hunan University, Changsha City, 410082, P.R. China

<sup>2</sup>Institute of Materials, Ningbo University of Technology, Ningbo City, 315016, P.R. China

<sup>3</sup>School of Materials Science and Engineering, Nanjing University of Science and Technology, Nanjing,  
China.

<sup>4</sup>State Key Laboratory of Advanced Design and Manufacturing for Vehicle Body, College of  
Mechanical and Vehicle Engineering, Hunan University, Changsha City, 410082, P.R. China

**Table S1** The main experimental parameters of electrospinning process

| Stainless steel nozzle type | DC voltage | The distance between collector screen and nozzle tip | Injection speed | Humidity |
|-----------------------------|------------|------------------------------------------------------|-----------------|----------|
| 21G                         | 10 KV      | 15 cm                                                | 0.08 mm/min     | <40 %    |

**Table S2** The technological conditions of ALD ZnO

| Operating pressure 0.15 torr |              |          |        |
|------------------------------|--------------|----------|--------|
| Heater                       | 150 °C       | Hottrap  | 400 °C |
| Purge1/Purge2                | 120 °C/80 °C | Pumpline | 100 °C |
| Dose Diethyl Zinc            |              | 0.02 s   |        |
| Purge                        |              | 30 s     |        |
| Dose H <sub>2</sub> O        |              | 0.015 s  |        |
| Purge                        |              | 30 s     |        |

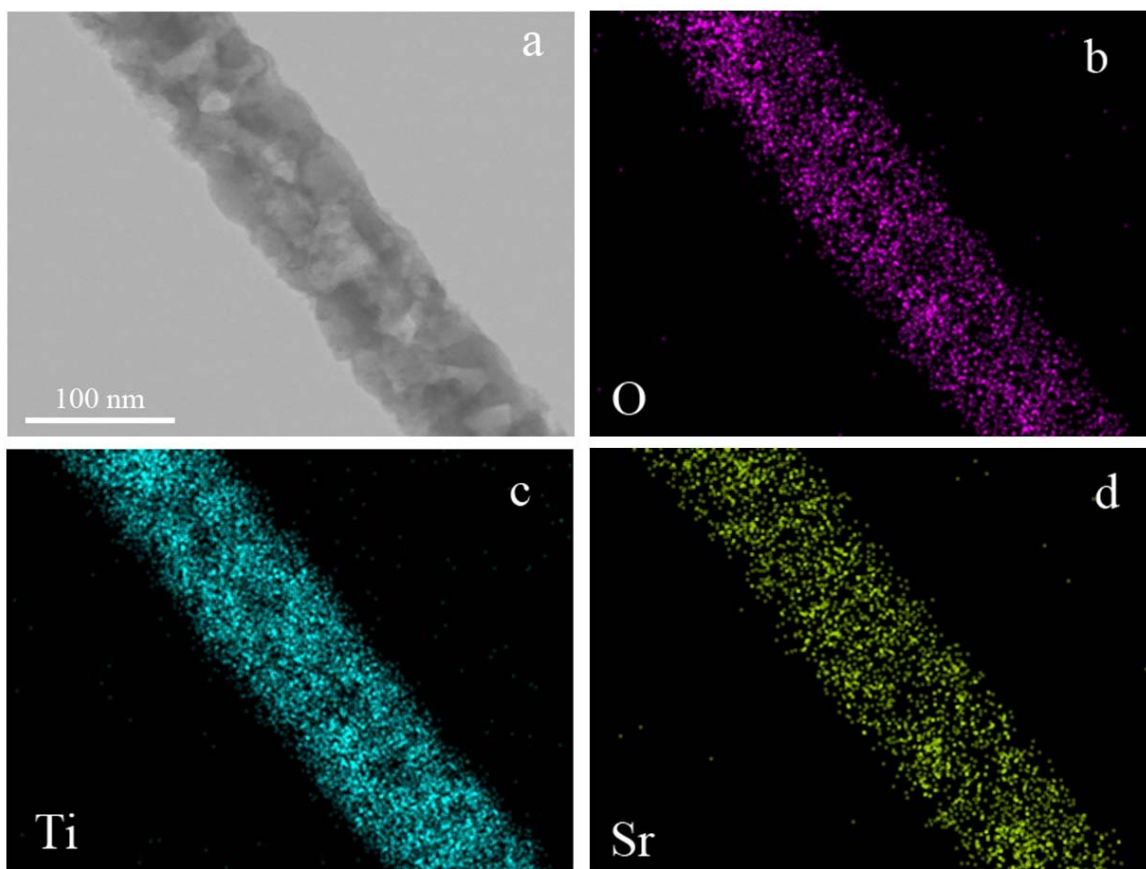

**Fig. S1.** (a) A typical TEM image of a single STO nanofiber. (b-d) The element mappings of O, Ti and Sr, respectively.

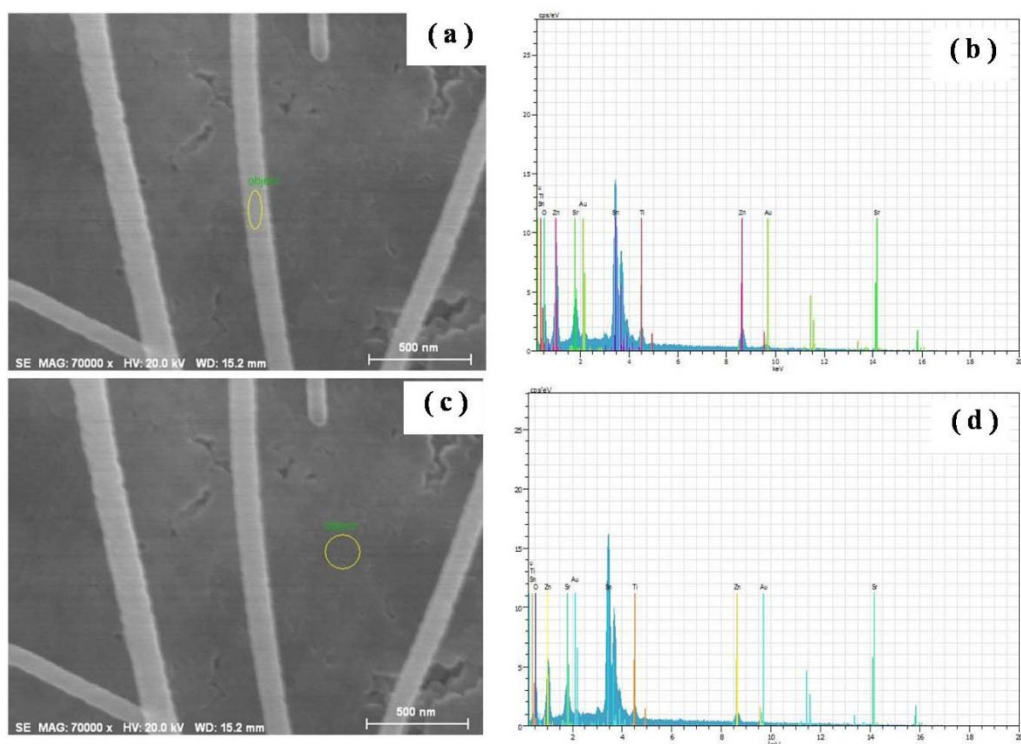

**Fig. S2.** (a-b) Typical SEM image and corresponding EDX spectrum of STO nanofibers after ALD of ZnO, respectively. (c-d) Typical SEM image and corresponding EDX spectrum of STO nanofilm after ALD of ZnO, respectively.

**Table S3** Chemical compositions of STO nanofibers after 300 cycle ALD of ZnO

| Element | Weight % | Atom % |
|---------|----------|--------|
| Sr      | 8.49     | 4.04   |
| Ti      | 3.83     | 3.33   |
| Zn      | 10.38    | 6.61   |
| O       | 26.36    | 68.62  |
| Sn      | 47.49    | 16.66  |
| Au      | 3.45     | 0.73   |

**Table S4** Chemical compositions of STO film after 300 cycle ALD of ZnO

| Element | Weight % | Atom % |
|---------|----------|--------|
| Sr      | 7.29     | 3.85   |
| Ti      | 3.32     | 3.21   |
| Zn      | 6.10     | 4.31   |
| O       | 22.59    | 65.29  |
| Sn      | 58.71    | 22.87  |
| Au      | 2.00     | 0.47   |

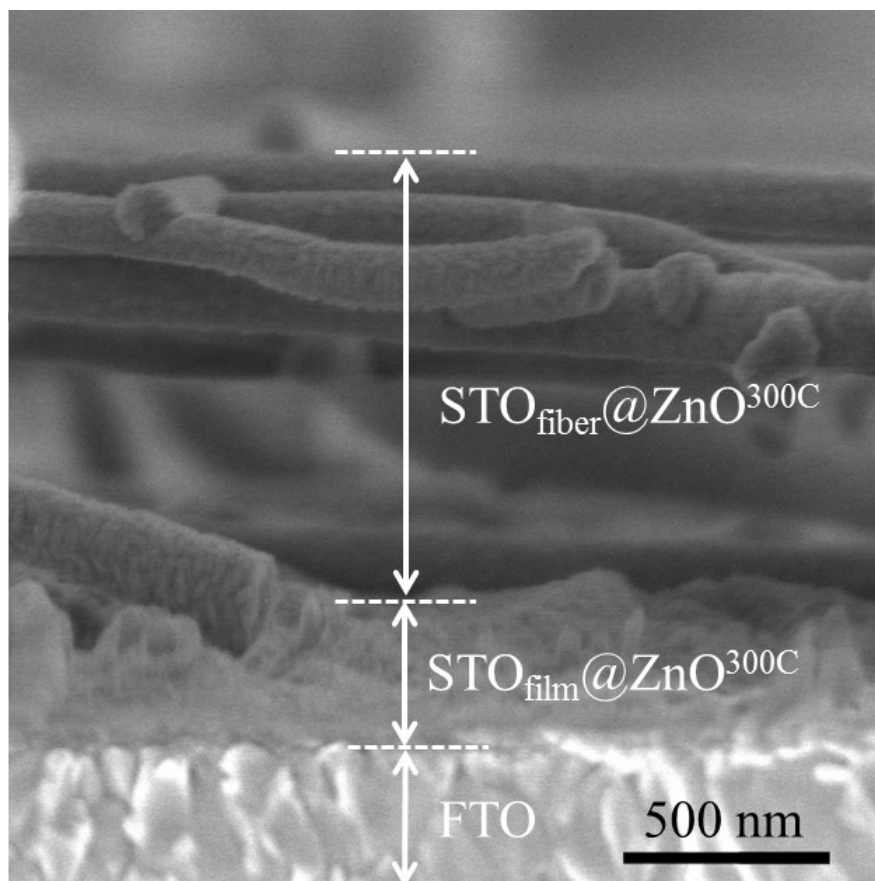

Fig. S3. SEM cross sectional photograph of  $\text{STO}@ \text{ZnO}^{300\text{C}}$

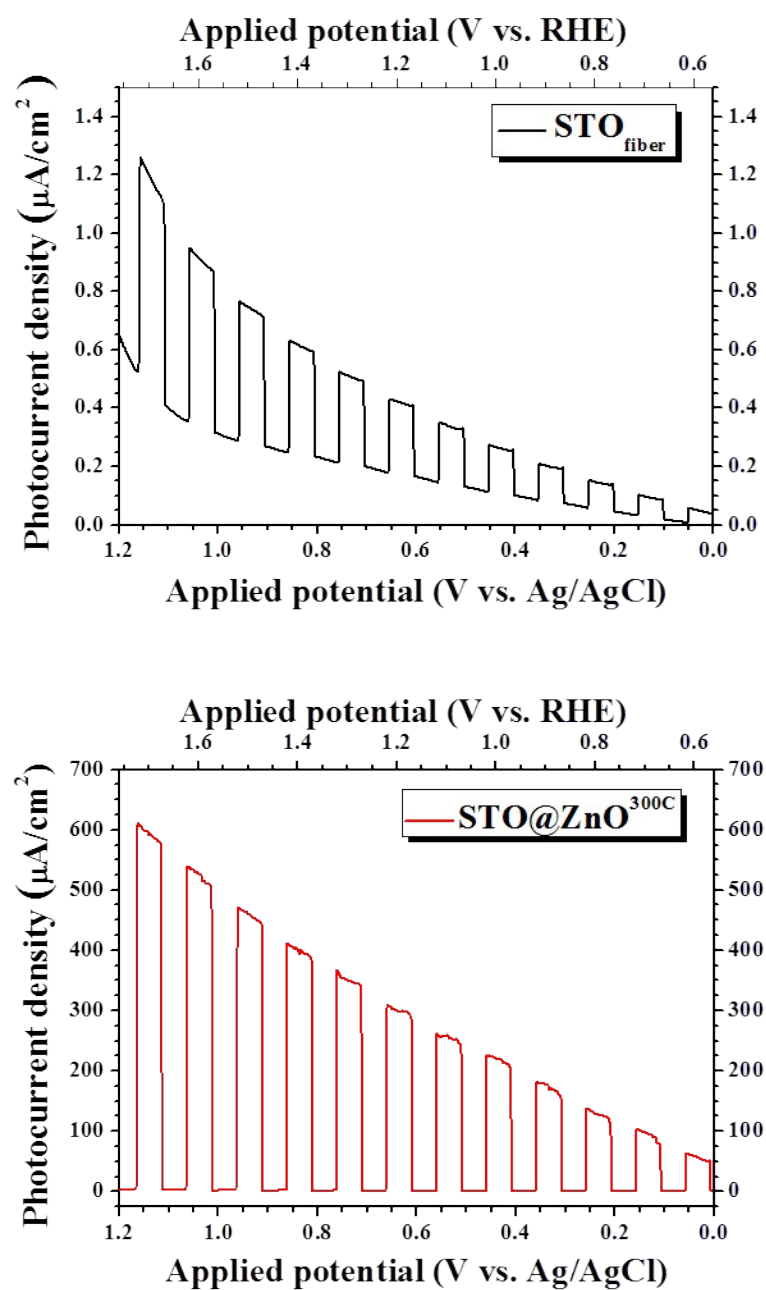

**Fig. S4.** (a-b) Photocurrent density vs. applied potential plots of samples STO<sub>fiber</sub> and STO@ZnO<sup>300C</sup>, respectively.

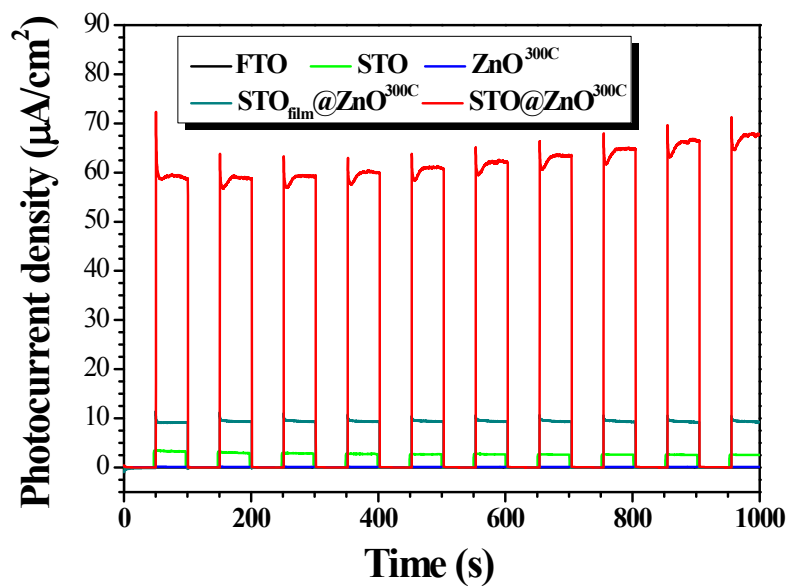

**Fig. S5.** The chopped transient photocurrent density vs. time recorded from the photoanodes of FTO, STO,  $\text{ZnO}^{300\text{C}}$ ,  $\text{STO}_{\text{film}}@\text{ZnO}^{300\text{C}}$  and  $\text{STO}@\text{ZnO}^{300\text{C}}$  under 0 V vs. Ag/AgCl, respectively.



**Table S5** Typical photocurrent densities of STO-based photoanodes at 0 V *vs.* Ag/AgCl in the previously reported works

| Synthesis approach                                       | Electrolyte                    | Photocurrent densities<br>( $\mu\text{A}/\text{cm}^2$ ) | References   |
|----------------------------------------------------------|--------------------------------|---------------------------------------------------------|--------------|
| Pure STO nanocube by nonaqueous ionic liquid route       | 0.1 M $\text{Na}_2\text{SO}_4$ | 0.5                                                     | 1            |
| STO film by sol-gel method                               | 0.1 M KOH                      | 1.7                                                     | 2            |
| STO film and STO nanofibers                              | 0.5 M $\text{Na}_2\text{SO}_4$ | 2.73                                                    | Current work |
| Ho-doped STO film                                        | 0.1 M KOH                      | 3                                                       | 2            |
| NiO nanoparticle-decorated STO nanocube                  | 0.1 M $\text{Na}_2\text{SO}_4$ | 3.5                                                     | 1            |
| First Ho-doped STO film and the deposit Pt nanoparticles | 0.1 M KOH                      | 4                                                       | 2            |
| STO- $\text{TiO}_2$ eutectic composite                   | $\text{Na}_2\text{SO}_4$       | 7.75                                                    | 3            |
| STO with ALD ZnO film                                    | 0.5 M $\text{Na}_2\text{SO}_4$ | 61.3                                                    | Current work |

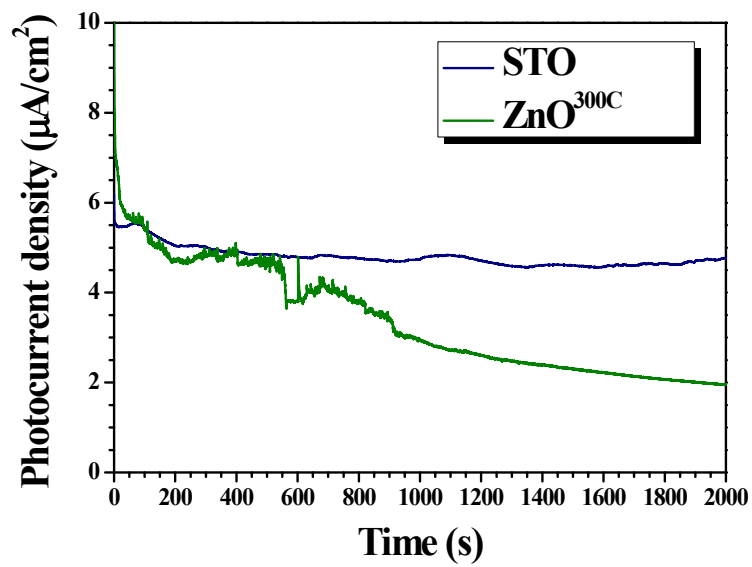

**Fig. S6** The PEC stabilities of pure STO and  $\text{ZnO}^{300\text{C}}$  photoanodes measured at 0.1 V vs. Ag/AgCl.

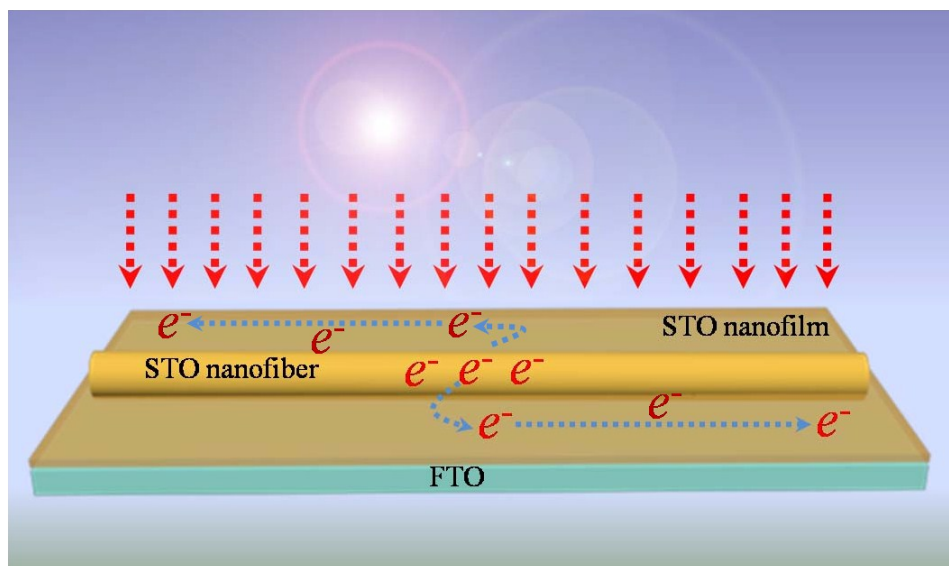

**Fig. S7.** Schematic illustration for the enlarged contact area to allow the high electron-hole mobility across the interface with a solid contact between the as-spun STO fibers and FTO substrate.

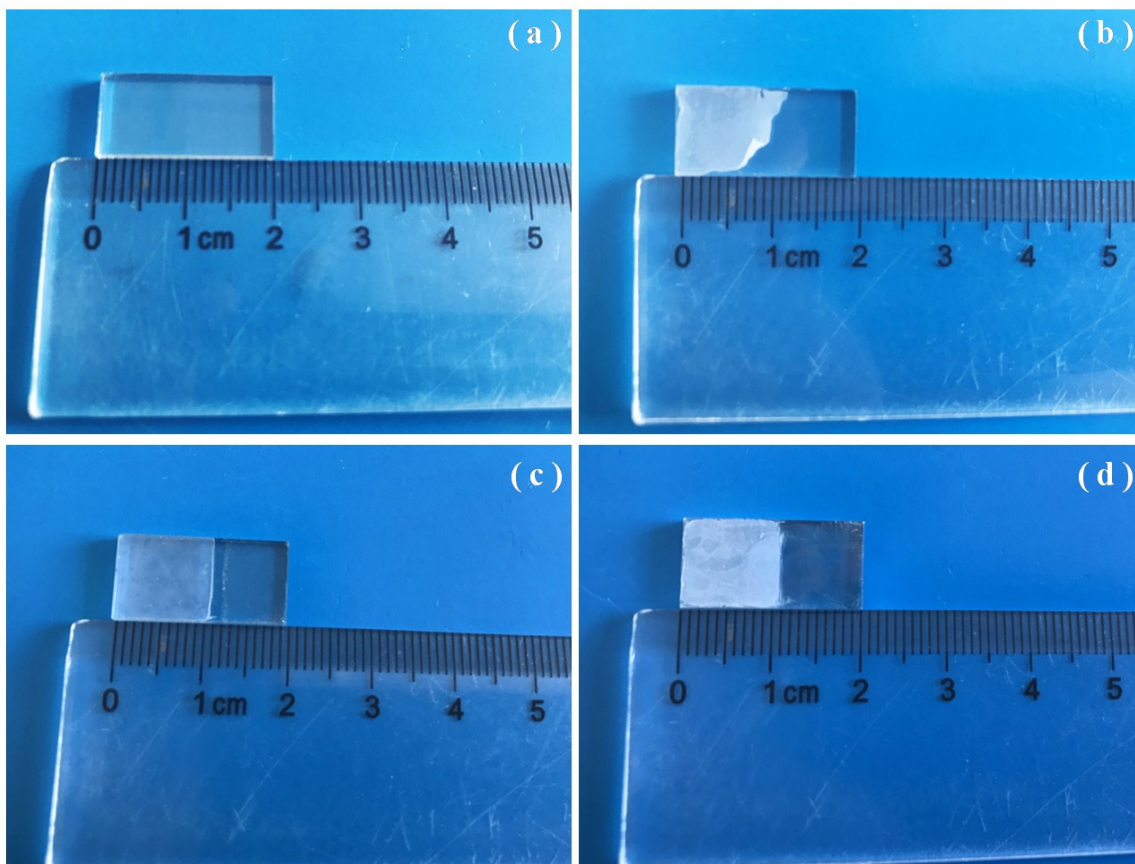

**Fig. S8.** Typical digital photographs of as-prepared photoanodes, disclosing that the introduced STO film brings a solid contact of as-spun STO fibers to the FTO substrate. (a) spin coated STO film on FTO substrate (sample  $\text{STO}_{\text{film}}$ ). (b) electrospun STO nanofibers on FTO substrate (sample  $\text{STO}_{\text{fiber}}$ ). (c) electrospun STO nanofibers on FTO substrate with the spin coated STO film (sample STO). (d) electrospun STO nanofibers on FTO substrate with the spin coated STO film (sample  $\text{STO}@\text{ZnO}^{300}$ ).

## References

1. W. Wang, W. Zhang, C. Hao, F. Wu, Y. Liang, H. Shi, J. Wang, T. Zhang and Y. Hua, *Sol. Energ. Mat. and Sol. C.* 2016, **152**, 1-9.
2. L. Zhao, L. Fang, W. Dong, F. Zheng, M. Shen and T. Wu, *Appl. Phys. Lett.*, 2013, **102**, 3593.
3. K. Wysmulek, J. Sar, P. Osewski, K. Orlinski, K. Kolodziejak, A. Trenczek-Zajac, M. Radecka and D. A. Pawlak, *Appl. Catal. B*, 2017, **206**, 538-546.
